# Supplementary material
Source: Springer Nature journal article supplement (https://www.springermedizin.de/resource/supplementary/13256_2014_3062_MOESM3_ESM.pdf/9651102)

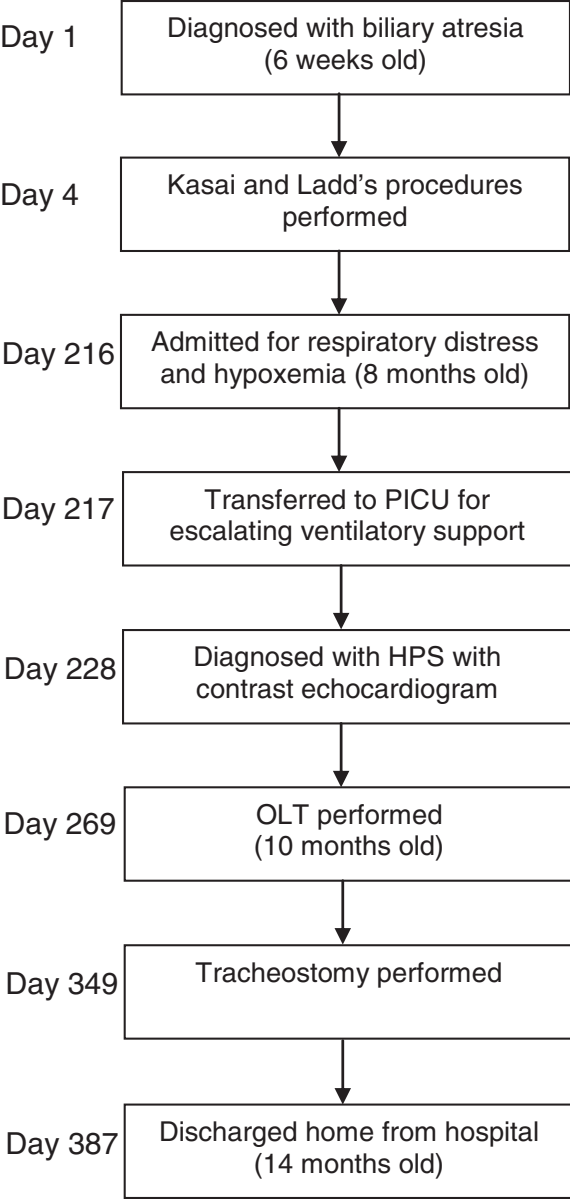

Supplement: MOESM3 [file 9651102]
